# Supplementary material for: The impact of the lookback period and definition of confirmatory events on the identification of incident cancer cases in administrative data
Source: Springer Nature journal article supplement (doi:10.1186/s12874-017-0407-4), 2017-08-14
Supplement: MOESM1 [file 14215122]

## **Additional file 1: Results of the sensitivity analyses**

### **The impact of the lookback period and definition of confirmatory events on the identification of incident cancer cases in administrative data**

BMC Medical Research Methodology

Jonas Czwikla<sup>1,2</sup>, Kathrin Jobski<sup>3</sup>, Tania Schink<sup>4</sup>

<sup>1</sup> Department of Health, Long-term Care and Pensions, SOCIUM Research Center on Inequality and Social Policy, University of Bremen, P.O. Box 33 04 40, 28334 Bremen, Germany

<sup>2</sup> High-Profile Area Health Sciences, University of Bremen, P.O. Box 33 04 40, 28334 Bremen, Germany

<sup>3</sup> Department of Health Services Research, Carl von Ossietzky University of Oldenburg, P.O. Box 2503, 26111 Oldenburg, Germany

<sup>4</sup> Leibniz Institute for Prevention Research and Epidemiology - BIPS, Drug Safety Unit, Achterstrasse 30, 28359 Bremen, Germany

#### **Corresponding author**

Jonas Czwikla, M.A.

#### **Co-authors**

Dr. rer. nat. Kathrin Jobski

Dr. rer. medic. Tania Schink

#### **Description**

We conducted two sensitivity analyses. In the first analysis (results are shown in Table A.1 and Figure A.1), the study population comprised all insured persons with at least 1 year (instead of 7 years) of continuous insurance on 01 January 2013. In the second analysis (results are shown in Table A.2 and Figure A.2), the study population comprised all insured persons with a continuous insurance of at least the length of the respective lookback period on 01 January 2013.

**Table A.1: Numerator (n), crude cumulative incidences (CCI) and age-standardized cumulative incidences (ACI) per 100,000 insured persons for breast, prostate and colorectal cancer in 2013 (sensitivity analysis 1).**

| Algorithm    | Description                                                                       | Breast cancer (women)<br>Denominator: n = 4,973,849 |                 |                 | Prostate cancer (men)<br>Denominator: n = 3,534,427 |                 |                 | Colorectal cancer (overall)<br>Denominator: n = 8,508,276 |                 |                 |
|--------------|-----------------------------------------------------------------------------------|-----------------------------------------------------|-----------------|-----------------|-----------------------------------------------------|-----------------|-----------------|-----------------------------------------------------------|-----------------|-----------------|
|              |                                                                                   | Num. (n)                                            | CCI per 100,000 | ACI per 100,000 | Num. (n)                                            | CCI per 100,000 | ACI per 100,000 | Num. (n)                                                  | CCI per 100,000 | ACI per 100,000 |
| 1. L1-C1     | Baseline algorithm, lookback 1 year, confirmation 1 quarter                       | 11,164                                              | 224.5           | 137.0           | 6,667                                               | 188.6           | 103.8           | 6,987                                                     | 82.1            | 42.4            |
| 2. L2-C1     | Lookback 2 years                                                                  | 10,580                                              | 212.7           | 130.8           | 6,335                                               | 179.2           | 99.1            | 6,585                                                     | 77.4            | 40.1            |
| 3. L3-C1     | Lookback 3 years                                                                  | 10,317                                              | 207.4           | 127.7           | 6,167                                               | 174.5           | 96.6            | 6,394                                                     | 75.2            | 39.1            |
| 4. L4-C1     | Lookback 4 years                                                                  | 10,164                                              | 204.3           | 125.9           | 6,083                                               | 172.1           | 95.2            | 6,299                                                     | 74.0            | 38.5            |
| 5. L5-C1     | Lookback 5 years                                                                  | 10,054                                              | 202.1           | 124.6           | 6,021                                               | 170.4           | 94.3            | 6,223                                                     | 73.1            | 38.0            |
| 6. L6-C1     | Lookback 6 years                                                                  | 9,955                                               | 200.1           | 123.2           | 5,929                                               | 167.7           | 92.8            | 6,147                                                     | 72.2            | 37.4            |
| 7. L7-C1     | Lookback 7 years                                                                  | 9,845                                               | 197.9           | 121.6           | 5,875                                               | 166.2           | 91.9            | 6,097                                                     | 71.7            | 37.1            |
| 8. L1-C4     | Confirmation 4 quarters                                                           | 12,145                                              | 244.2           | 149.6           | 7,388                                               | 209.0           | 114.9           | 7,739                                                     | 91.0            | 47.1            |
| 9. L7-C4     | Lookback 7 years, confirmation 4 quarters                                         | 10,339                                              | 207.9           | 128.3           | 6,346                                               | 179.5           | 99.3            | 6,614                                                     | 77.7            | 40.3            |
| 10. L1-C0    | No confirmatory event required                                                    | 15,083                                              | 303.2           | 193.0           | 9,012                                               | 255.0           | 142.1           | 10,439                                                    | 122.7           | 67.2            |
| 11. L7-C0    | Lookback 7 years, no confirmatory event required                                  | 12,344                                              | 248.2           | 159.0           | 7,558                                               | 213.8           | 120.0           | 8,775                                                     | 103.1           | 56.7            |
| 12. L1-C1-ed | Exclusion of death as confirmatory event                                          | 10,983                                              | 220.8           | 135.6           | 6,496                                               | 183.8           | 101.7           | 6,453                                                     | 75.8            | 39.8            |
| 13. L7-C1-ed | Lookback 7 years, exclusion of death as confirmatory event                        | 9,695                                               | 194.9           | 120.4           | 5,728                                               | 162.1           | 90.1            | 5,600                                                     | 65.8            | 34.7            |
| 14. L1-C4-su | Confirmation 4 quarters, surgery as required confirmatory event                   | 8,878                                               | 178.5           | 113.3           | N/A                                                 | N/A             | N/A             | 6,072                                                     | 71.4            | 37.4            |
| 15. L7-C4-su | Lookback 7 years, confirmation 4 quarters, surgery as required confirmatory event | 8,394                                               | 168.8           | 106.5           | N/A                                                 | N/A             | N/A             | 5,572                                                     | 65.5            | 34.0            |

Sensitivity analysis 1: All insured persons with a minimum of 1 year of continuous insurance on 01 January 2013.

Specification of the algorithms: L1 to L7 = length of lookback period; C0, C1 and C4 = length of confirmation period; ed = exclusion of death as confirmatory event; su = surgery as required confirmatory event.

**Table A.2: Numerator (n), denominator (n), crude cumulative incidences (CCI) and age-standardized cumulative incidences (ACI) per 100,000 insured persons for breast, prostate and colorectal cancer in 2013 (sensitivity analysis 2).**

| Algorithm    | Description                                                                       | Breast cancer (women) |            |                 |                 | Prostate cancer (men) |            |                 |                 | Colorectal cancer (overall) |            |                 |                 |
|--------------|-----------------------------------------------------------------------------------|-----------------------|------------|-----------------|-----------------|-----------------------|------------|-----------------|-----------------|-----------------------------|------------|-----------------|-----------------|
|              |                                                                                   | Num. (n)              | Denom. (n) | CCI per 100,000 | ACI per 100,000 | Num. (n)              | Denom. (n) | CCI per 100,000 | ACI per 100,000 | Num. (n)                    | Denom. (n) | CCI per 100,000 | ACI per 100,000 |
| 1. L1-C1     | Baseline algorithm, lookback 1 year, confirmation 1 quarter                       | 11,164                | 4,973,849  | 224.5           | 137.0           | 6,667                 | 3,534,427  | 188.6           | 103.8           | 6,987                       | 8,508,276  | 82.1            | 42.4            |
| 2. L2-C1     | Lookback 2 years                                                                  | 10,470                | 4,786,780  | 218.7           | 132.1           | 6,283                 | 3,356,505  | 187.2           | 99.9            | 6,535                       | 8,143,285  | 80.3            | 40.5            |
| 3. L3-C1     | Lookback 3 years                                                                  | 10,127                | 4,614,898  | 219.4           | 130.6           | 6,071                 | 3,191,477  | 190.2           | 97.8            | 6,290                       | 7,806,375  | 80.6            | 39.6            |
| 4. L4-C1     | Lookback 4 years                                                                  | 9,902                 | 4,474,085  | 221.3           | 129.7           | 5,946                 | 3,046,058  | 195.2           | 96.7            | 6,165                       | 7,520,143  | 82.0            | 39.2            |
| 5. L5-C1     | Lookback 5 years                                                                  | 9,729                 | 4,351,412  | 223.6           | 129.2           | 5,857                 | 2,925,796  | 200.2           | 96.2            | 6,062                       | 7,277,208  | 83.3            | 39.0            |
| 6. L6-C1     | Lookback 6 years                                                                  | 9,571                 | 4,222,455  | 226.7           | 129.1           | 5,713                 | 2,796,503  | 204.3           | 95.3            | 5,931                       | 7,018,958  | 84.5            | 38.4            |
| 7. L7-C1     | Lookback 7 years                                                                  | 9,409                 | 4,093,251  | 229.9           | 129.0           | 5,623                 | 2,670,298  | 210.6           | 95.1            | 5,842                       | 6,763,549  | 86.4            | 38.3            |
| 8. L1-C4     | Confirmation 4 quarters                                                           | 12,145                | 4,973,849  | 244.2           | 149.6           | 7,388                 | 3,534,427  | 209.0           | 114.9           | 7,739                       | 8,508,276  | 91.0            | 47.1            |
| 9. L7-C4     | Lookback 7 years, confirmation 4 quarters                                         | 9,866                 | 4,093,251  | 241.0           | 136.0           | 6,077                 | 2,670,298  | 227.6           | 102.9           | 6,335                       | 6,763,549  | 93.7            | 41.6            |
| 10. L1-C0    | No confirmatory event required                                                    | 15,083                | 4,973,849  | 303.2           | 193.0           | 9,012                 | 3,534,427  | 255.0           | 142.1           | 10,439                      | 8,508,276  | 122.7           | 67.2            |
| 11. L7-C0    | Lookback 7 years, no confirmatory event required                                  | 11,728                | 4,093,251  | 286.5           | 169.7           | 7,224                 | 2,670,298  | 270.5           | 124.5           | 8,382                       | 6,763,549  | 123.9           | 59.1            |
| 12. L1-C1-ed | Exclusion of death as confirmatory event                                          | 10,983                | 4,973,849  | 220.8           | 135.6           | 6,496                 | 3,534,427  | 183.8           | 101.7           | 6,453                       | 8,508,276  | 75.8            | 39.8            |
| 13. L7-C1-ed | Lookback 7 years, exclusion of death as confirmatory event                        | 9,261                 | 4,093,251  | 226.3           | 127.7           | 5,478                 | 2,670,298  | 205.1           | 93.2            | 5,360                       | 6,763,549  | 79.2            | 35.8            |
| 14. L1-C4-su | Confirmation 4 quarters, surgery as required confirmatory event                   | 8,878                 | 4,973,849  | 178.5           | 113.3           | N/A                   | N/A        | N/A             | N/A             | 6,072                       | 8,508,276  | 71.4            | 37.4            |
| 15. L7-C4-su | Lookback 7 years, confirmation 4 quarters, surgery as required confirmatory event | 8,015                 | 4,093,251  | 195.8           | 113.1           | N/A                   | N/A        | N/A             | N/A             | 5,341                       | 6,763,549  | 79.0            | 35.2            |

Sensitivity analysis 2: All insured persons with a continuous insurance of at least the length of the respective lookback period on 01 January 2013.

Specification of the algorithms: L1 to L7 = length of lookback period; C0, C1 and C4 = length of confirmation period; ed = exclusion of death as confirmatory event; su = surgery as required confirmatory event.

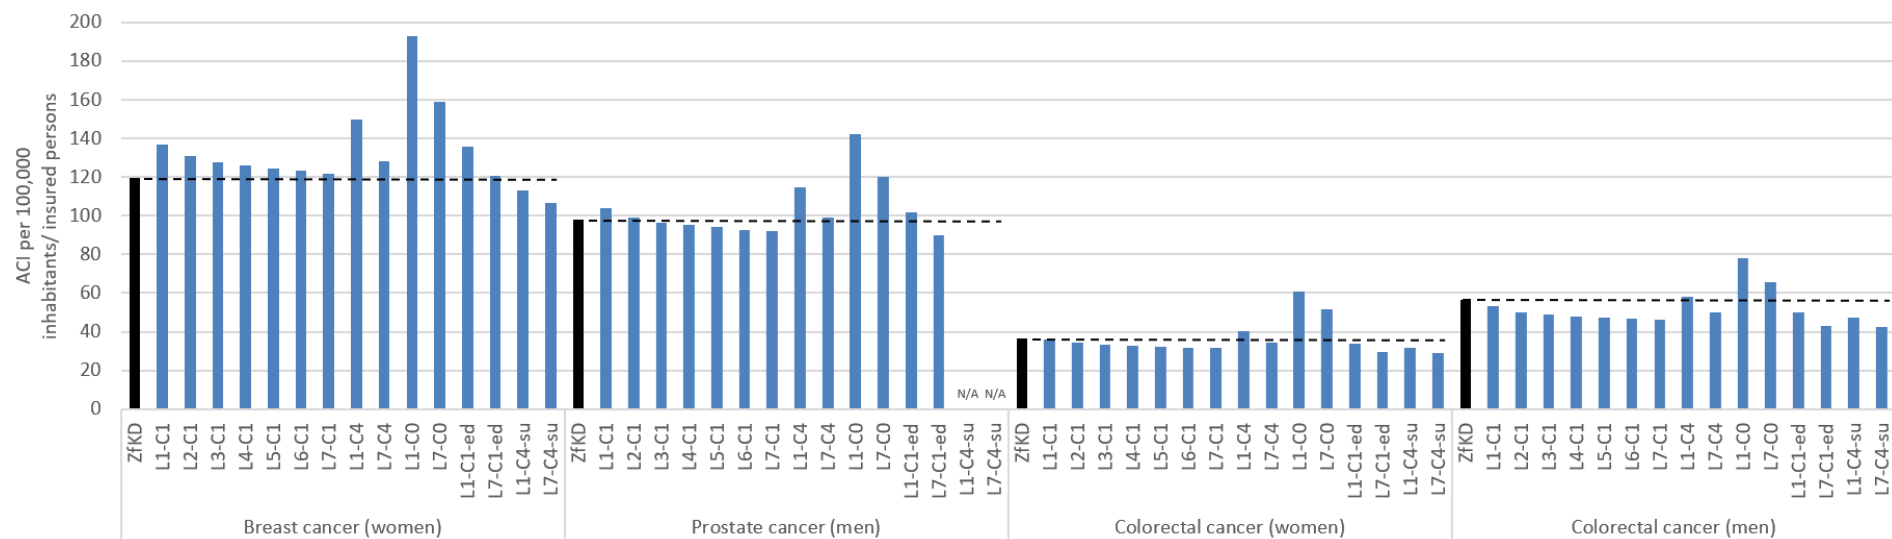

**Figure A.1: Age-standardized cumulative incidence (ACI) per 100,000 inhabitants presented by the German Centre for Cancer Registry Data (ZfKD) compared to ACI per 100,000 insured persons (claims data, algorithm 1 to 12) for breast, prostate and colorectal cancer in 2013 ([sensitivity analysis 1](#)).**

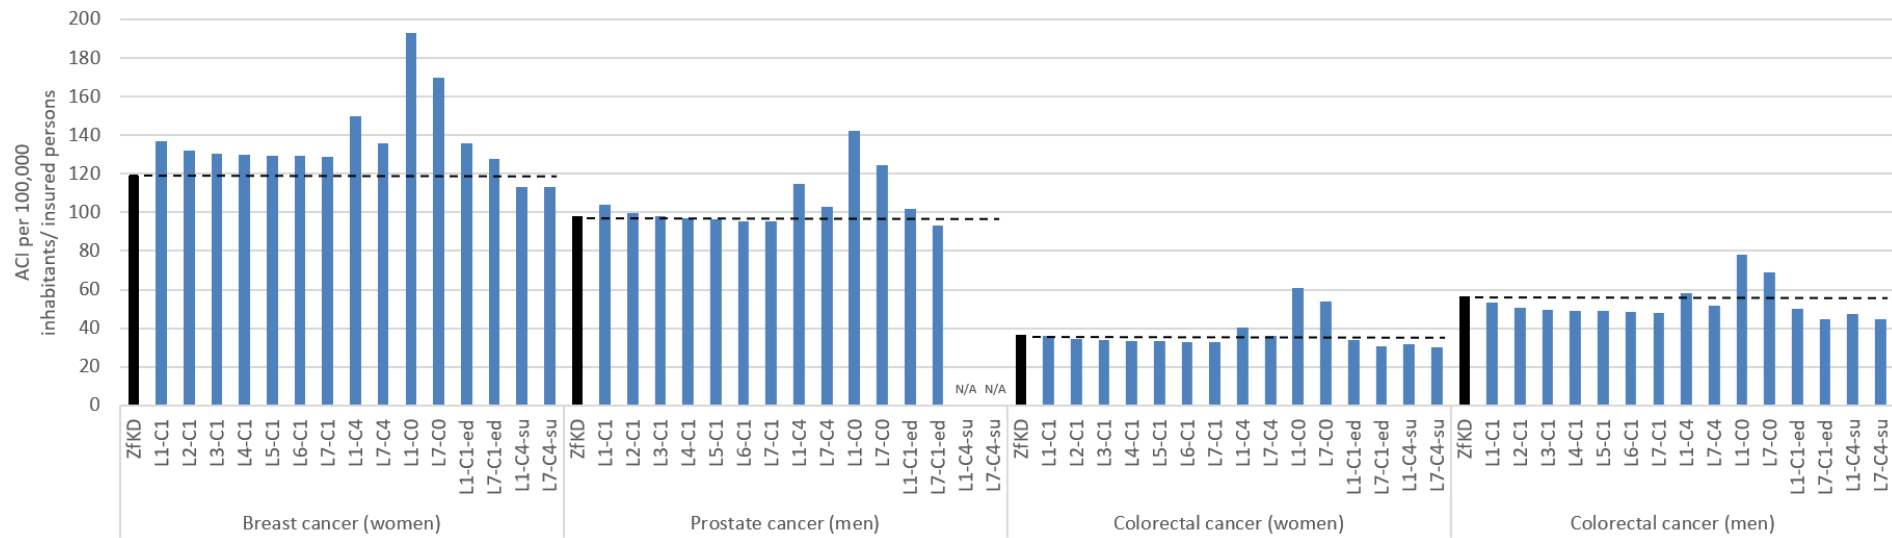

**Figure A.2: Age-standardized cumulative incidence (ACI) per 100,000 inhabitants presented by the German Centre for Cancer Registry Data (ZfKD) compared to ACI per 100,000 insured persons (claims data, algorithm 1 to 12) for breast, prostate and colorectal cancer in 2013 ([sensitivity analysis 2](#)).**
